# Supplementary material for: Alicenet – An Italian network of Automated Lidar-Ceilometers for 4D aerosol monitoring: infrastructure, data processing, and applications
Source: Copernicus journal article supplement (doi:10.5194/egusphere-2024-730), 2024-05-02
Supplement: Supplementary file 2 [file egusphere-2024-730-supplement.pdf]

1 *Supplement of*

2 **Alicenet - An Italian network of Automated Lidar-Ceilometers for**  
3 **4D aerosol monitoring: infrastructure, data processing, and**  
4 **applications**

5 **S1 Cloud screening**

6 In order to avoid cloud contamination within the aerosol retrievals, the ALC signals are filtered from 500 m below the Cloud  
7 Base Height (CBH, identified by the ALC) up. This threshold was setted to avoid both the presence of cloud droplets and  
8 virga frequently observed below CBH. Furthermore, ALC signals are filtered out 15 min before and after the cloud  
9 detection. As an example of the effectiveness of the cloud screening procedure, Fig. S1 shows both the 1-hour averaged  
10 cloud screened and cloud unscreened total attenuated backscatter profiles derived from the Alicenet CHM15k in Aosta in  
11 three different cloudy conditions. These were characterised by the presence of low (Fig. S1a), medium (Fig. S1b), and high  
12 (Fig. S1c) clouds.

13

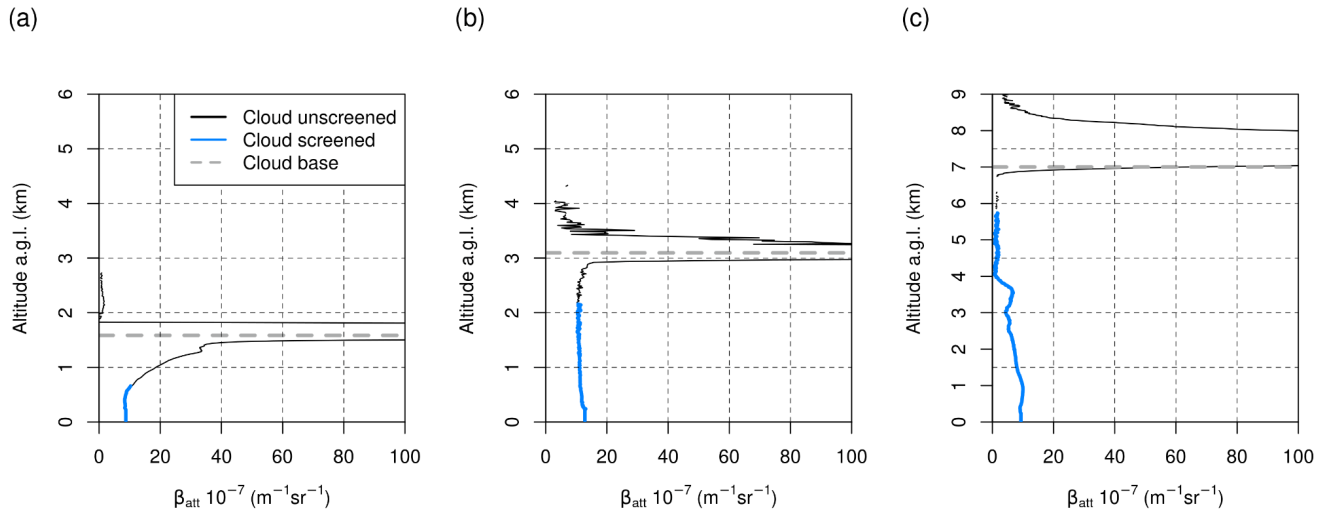

15 **Figure S1:** Cloud (un)screened total attenuated backscatter profiles derived from the CHM15K signals in Aosta: (a) 19/06/2022 4-5 UTC,  
 16 (b) 27/06/2022 11-12 UTC, (c) 18/06/2022 20-21 UTC. Values cat at 100 m-1 sr-1 to highlight aerosol profiles.

## 17 S2 Overlap correction

18 Within Alicenet, the overlap correction applied to CHM15k systems is based on the procedure of Hervo et al. (2016). This  
 19 procedure first selects time windows reasonably associated with the presence of an homogeneous aerosol layer near the  
 20 surface by considering the ALC signal in the lowermost levels with complete overlap (typically > 800-1200 m for CHM15k  
 21 systems). For each window an overlap correction factor ( $f_c(r)$ ) for the overlap function provided by the manufacturer  
 22 ( $Ovl_{man}(r)$ ) is derived by imposing the ALC signal to be constant down to the ground. The overlap function resulting from the  
 23 application of  $f_c(r)$  can thus be expressed as:

$$24 \quad Ovl(r) = \frac{Ovl_{man}(r)}{f_c(r)} \quad (1)$$

25 The relative difference between the Ovl-corrected and the  $Ovl_{man}$ -corrected ALC signals is thus  $RD(r) = f_c(r) - 1$ .

26 The procedure is generally applied over a > 1-year ALC dataset. From an ensemble of overlap correction factors and  
 27 associated median instrument internal temperatures ( $T_m$ ), a temperature-dependent overlap model  $Ovl(r, T)$  is derived  
 28 assuming a linear dependence of  $RD(r)$  on  $T_m$ .

29 Within Alicenet, prior to the derivation of the overlap model, the ensemble of overlap correction factors is quality checked to  
 30 filter those reasonably derived in inhomogeneous conditions. To this purpose, for each  $f_c(r)$  a metric ( $M_{ov}$ ) function of  $RD(r)$   
 31 and  $T_m$  is calculated:

$$32 \quad M_{ov} = \sum \left( \frac{\overline{|RD(r) - RD_{near}(r)|}}{|T_m - T_{near}|} \right) / N \quad (2)$$

33 where the sum is done over the  $N$  nearest (in temperature, i.e.,  $\Delta T_m < 5$  K) relative differences ( $RD_{near}$ ) and associated  
 34 instrument internal temperatures ( $T_{near}$ ), and the overline denotes the median over the range 225-1200 m. The overlap  
 35 correction factors associated with  $M_{ov} < 0.05$  are filtered out.

36 Finally, if the number of non-rejected overlap correction factors is  $> 20$ , the overlap model is derived with a robust linear fit  
 37 (rlm R package). As an example, the overlap models derived for the Alicenet CHM15k in Rome and Aosta exploiting the  
 38 ALC 2019-2021 datasets are shown in Fig. S2.

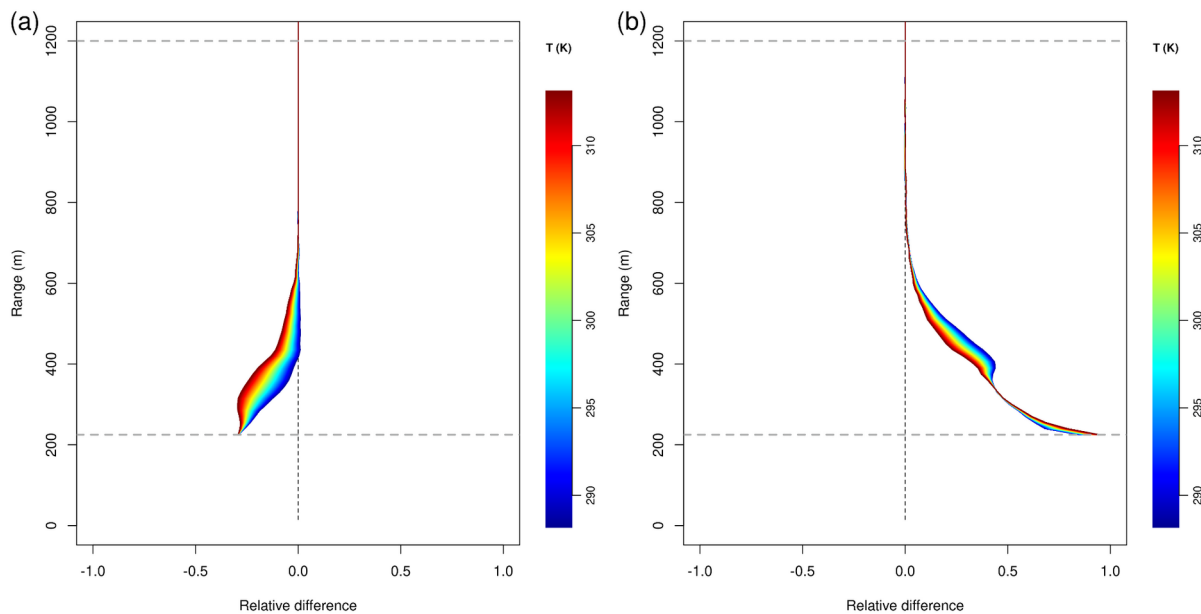

40 **Figure S2:** Overlap models derived for the Alicenet CHM15k in (a) Rome, and (b) Aosta.

### 42 **S3 Absolute calibration**

43 The Rayleigh calibration implemented within Alicenet is based on the comparison between the ALC signal, temporally  
 44 averaged over a nighttime window of 3-6 hours (depending on cloudiness), and the theoretical molecular attenuated (by  
 45 molecules) backscatter profile at altitude ranges of 3-7 km altitude. Along this vertical range, a fine grid of ‘potential’  
 46 molecular windows centred at different altitudes and with variable amplitudes (from 600 to 3000 m, at steps of 30 m) is  
 47 constructed, and for each potential range-window (i.e. combination of central altitude and amplitude) the linear fit between  
 48 the ALC signal and the theoretical molecular attenuated (by molecules) backscatter profile, and the Breusch-Godfrey test  
 49 (BG test; bgtest R package) for the calculation of autocorrelation in residuals are performed. The molecular window selected  
 50 for the calibration is the one maximising a metric ( $M_{ray}$ ) function of the adjusted  $R^2$  (adjR2) and the intercept (b) of the linear  
 51 fit, defined as follows:

$$52 \quad M_{ray} = \frac{adjR^2 + (1 - |b|)}{std(b)} \quad (3)$$

53 where  $std(b)$  denotes the standard deviation of the intercept of the linear fit over the grid of potential molecular windows.  
 54 The quality control QC2 is conceived to filter an erroneously selected window associated with the presence of an  
 55 homogeneous aerosol layer within its borders. To this purpose, the autocorrelation (BG test) and the cumulative sign in  
 56 residuals at the window borders are calculated ( $\pm 200$  m from each border). If the p-value of the BG test is  $> 0.05$  and the  
 57 cumulative sign in residuals is  $< 0$ , the window is rejected.

58 The uncertainty of the instrument calibration coefficient  $C_L$  is defined as follows:

$$59 \quad E_{CL} = \left( \frac{ster(C_L^{slope})}{C_L^{slope}} \right) + \left( \frac{std(C_L)}{C_L} \right) \quad (4)$$

60 In the first term,  $C_L^{slope}$  represents the slope of the fit between the ALC signal and the theoretical molecular attenuated  
 61 backscatter profile within the selected molecular window, and  $ster(C_L^{slope})$  the standard error of the slope. In the second term,  
 62  $C_L$  represents the calibration coefficient (more specifically, the median value of  $C_L$  along the molecular window) derived  
 63 following Wiegner and Geiß (2014), and  $std(C_L)$  the standard deviation of the calibration coefficient over the molecular  
 64 window. The calibration coefficients associated with relative uncertainty  $((E_{CL} / C_L) \cdot 100) > 40\%$  are rejected.

## 65 S4 Retrieval of aerosol properties

66 Within Alicenet, the aerosol extinction coefficient  $\alpha_p(r)$  is retrieved through a specific functional relationship linking this  
67 quantity to the aerosol backscatter coefficient  $\beta_p(r)$  as described by Dionisi et al. (2018). The Aerosol Optical Depth is then  
68 derived by integrating  $\alpha_p(r)$  over the ALC-probed column. Figure S3 shows the long-term (2016-2022), multi-site (Aosta,  
69 Roma, Messina) comparison between the AOD derived from Alicenet ALCs (at 1064 nm) and AERONET/SKYNET sun  
70 photometers (at 1020 nm). Data pairs associated with a photometer-derived Angstrom Exponent (AE) < 0.5, i.e., with  
71 coarse-mode dominated aerosol types such as desert dust or sea-salt particles, are highlighted in red.  
72

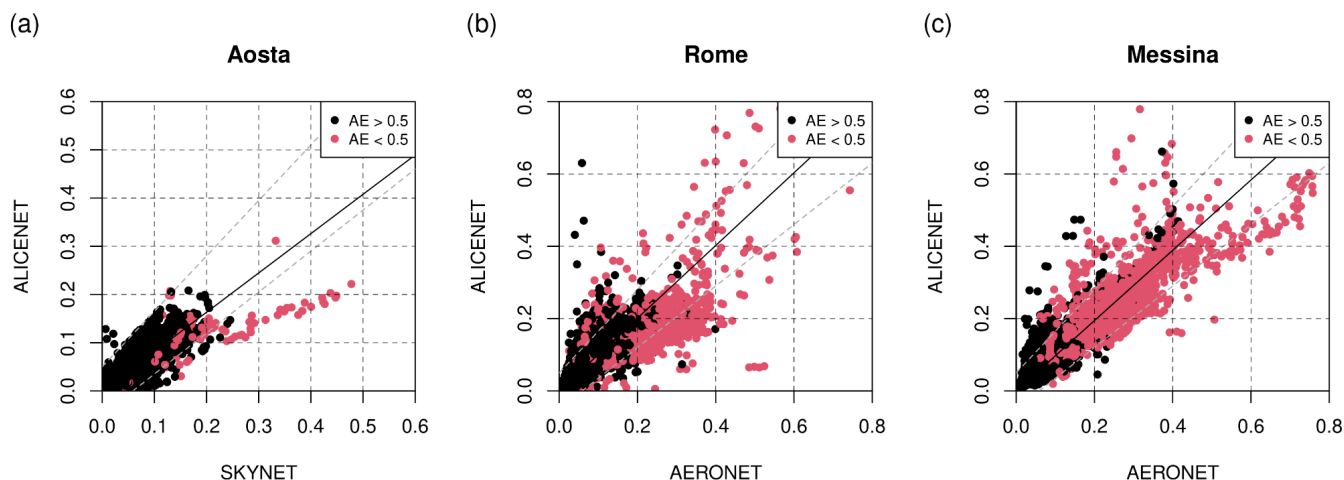

73 **Figure S3:** Comparison between the AOD derived by Alicenet (at 1064 nm) and AERONET/SKYNET sun photometers (at 1020 nm) in  
74 (a) Aosta, (b) Rome Tor Vergata, and (c) Messina over the 2016-2022 dataset. Black line is the linear fit. Gray dashed lines indicate a  
75 AOD-Alicenet deviation to the 1:1 line of  $\delta = \pm 0.01 \pm 0.15 \times \text{AOD}_{\text{sunphotometer}}$ . Data pairs associated with a photometer-derived  
76 Angstrom Exponent (AE) < 0.5 are highlighted in red.  
77

78 The aerosol mass concentration ( $M_p$ ) is estimated from the Alicenet-derived aerosol volume ( $V_p$ ) as  $M_p = \rho_p V_p$ , where  $\rho_p$  is  
79 an a-priori aerosol density. For comparison with in-situ instrumentation (as those operating in AQMN in compliance to the  
80 EU AQ Directive) generally drying the aerosol samples,  $M_p$  can be corrected to ‘dry’ aerosol mass ( $M_p^{\text{dry}}$ ) by taking aerosol  
81 hygroscopicity into account. The comparison between the Alicenet-derived  $M_p^{\text{dry}}$  and in-situ  $\text{PM}_{10}$  measurements was  
82 conducted exploiting the Alicenet CHM15k in Aosta and an OPC operating at the high altitude (3500 m a.s.l.) station Testa  
83 Grigia - Plateau Rosa (data courtesy of Stefania Gilaroni CNR-ISP). The map with the relative location of the Aosta and  
84 Testa Grigia - Plateau Rosa stations is shown in Fig. S4.

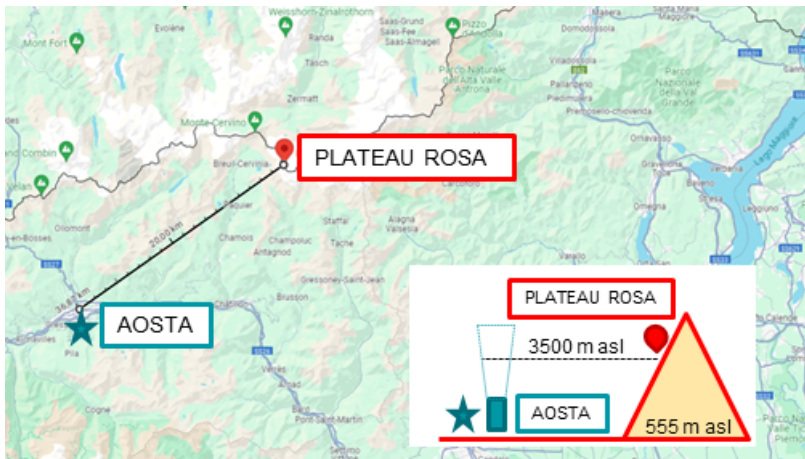

86 **Figure S4:** Map with the locations of the Aosta and Testa Grigia - Plateau Rosa stations. In the bottom-right corner, a scheme with the  
 87 station altitudes is reported (map credits: © Google Maps).  
 88

89 **S5 Identification of aerosol layers**

90 Within Alicenet, the identification of the main aerosol layer types (i.e., continuous, mixed, and elevated aerosol layers, CAL,  
 91 MAL, and EAL, respectively) is solely based on ALC data and takes advantage of specific procedures. In the following,  
 92 details are provided concerning the identification of:

93  
 94 a) the Mixed Aerosol Layer (MAL).

95 The search of the MAL height (MALH) starts 1 hour before sunrise and stops 1 hour after sunset (the site- and season-  
 96 dependent sunrise/sunset hours are calculated using the Michalsky algorithm; Michalsky, 1988), and is performed within  
 97 maximum/minimum heights defined by the user (generally, a maximum height of 3.5 km is setted during spring and  
 98 summer, and a minimum height of 250 m is setted all over the year).

99 For the search of the MALH, the Dynamic Time Warping algorithm (DTW, Giorgino et al., 2009) is applied to a sequence  
 100 (> 30 min) of denoised  $\beta_{\text{att}}$  profiles at 1 min resolution. This algorithm computes the local stretch or compression to apply to  
 101 each profile in order to optimally map the preceding into the following. Its output is a time- and range-dependent field  
 102 ( $w_{\text{DTW}}$ ) which can be interpreted as the local vertical displacement of the aerosol-loaded air parcels, and can be used to  
 103 identify regions where aerosols are mixed by vertical turbulent fluxes. The standard deviation of  $w_{\text{DTW}}$  ( $w_{\text{SD}}$ ) is thus  
 104 calculated over 30 min intervals, and at each interval the MALH is identified as the height of the  $w_{\text{SD}}$  local minima ( $Z_{\text{min}}$ )  
 105 which:

- 106 - lie in the vertical range (MALH(t-Δt)-300m, MALH(t-Δt)+1200m) during the morning (with Δt = 30 min), and  
 107 (MALH(t-Δt)+300 m, MALH(t-Δt)-1200 m) during the afternoon;  
 108 - minimise a metric function of wSD and the vertical increment with respect to MALH(t-Δt). This metric is defined  
 109 as follows:

$$110 \quad M_{mal} = \left| \overline{Z_{min}} - MALH(t - \Delta t) \right| + \frac{1}{\overline{wSD}} \quad (5)$$

111 where the overline represents the median along the vertical range (250 m,  $Z_{min}$ ).

112 Although the DTW technique already links each time step to the previous one, the inclusion of additional continuity criteria  
 113 within the procedure is foreseen in the next future.

114 If a 3D ultrasonic anemometer is co-located with the ALC, the MALH can be derived using a synergic approach. The  
 115 vertical increment between MALH(t) and MALH(t-Δt) is derived as the average of the increment computed with the ALC-  
 116 based procedure described above and the increment computed with ultrasonic anemometer data (Eddy-Covariance analysis).  
 117 The increment computed with ultrasonic anemometer data is defined as (Stull, 1988):

$$118 \quad dr = \frac{2 HFX \Delta t}{\Delta T} \quad (6)$$

119 where HFX is the surface sensible heat flux and ΔT is the increment of the surface air temperature within Δt (Δt = 30 min).

120

121 b) the Elevated Aerosol Layers (EALs).

122 The EAL ‘centres’ are detected through a Continuous Wavelet Transform (CWT) technique. The MassSpecWavelet  
 123 algorithm developed by Du et al. (2006) is used for this purpose. This algorithm takes as input cloud-screened and  
 124 denoised  $\beta_{att}$  profiles at 30 min resolution, and exploits both CWT and  $\beta_{att}$  coefficients to identify peaks (here referred to as  
 125 the EAL ‘centres’) attributable to aerosol layers and discriminate them from noise.

126 For each detected EAL ‘centre’, a grid of potential bottom and top semi-amplitudes (from 150 m to 1500 m, at steps of 60  
 127 m) is constructed (the procedure allows the selection of different semi-amplitudes for the layer bottom and top), and for each  
 128 potential bottom/top combination, a metric function of  $\beta_{att}$  and CWT coefficients is calculated. This metric is defined as  
 129 follows:

$$130 \quad M_{eal} = \frac{I(\beta_{att})}{I(\beta_r)} + Perc + G_{border} + CWT_{border} \quad (7)$$

131 In the first term (right-hand side), I represents the integral along the potential EAL top-bottom range, and  $\beta_r$  a reference total  
 132 attenuated backscatter profile. In the second term, Perc represents the percentage of points with  $\beta_{att} > \beta_{mol}$  within the top-  
 133 bottom range. In the third term,  $G_{border}$  represents the mean gradient of  $\beta_{att}$  around the potential layer boundaries ( $\pm 90$  m from

134 each border) normalised by the maximum value of the  $\beta_{att}$  gradient along the top-bottom range. In the fourth term,  $CWT_{border}$   
135 represents the mean CWT coefficient around the potential layer boundaries ( $\pm 90$  m from each border) normalised by the  
136 maximum value of the CWT coefficients along the top-bottom range.

137 The bottom/top combination maximising  $M_{eal}$  is selected and classified as the EAL vertical range. The selected EAL must  
138 verify specific criterias to be finally accepted:

- 139 - a percentage of points exceeding  $\beta_r > 90\%$  along the top-bottom range;
- 140 - an integrated (long the top-bottom range)  $\beta_{att} > 3$  times the integrated  $\beta_r$ ;
- 141 - a negative (positive)  $\beta_{att}$  gradient at the layer top (bottom), and negative CWT coefficients at both borders ( $\pm 90$  m  
142 from the bottom/top).

143 The threshold values 90% and 3 are user-defined.
